# Supplementary material for: Contrasting Inland-Coastal Aerosol Mixing States: An Entropy-Based Metric for CCN Activity
Source: Copernicus journal article supplement (doi:10.5194/egusphere-2025-3284), 2025-07-15
Supplement: Supplementary file 1 [file egusphere-2025-3284-supplement.pdf]

1 **Supporting Information**

2 **Contrasting Inland-Coastal Aerosol Mixing States: An Entropy-Based**  
3 **Metric for CCN Activity**

4 Jingye Ren<sup>1,2</sup>, Wei Xu<sup>3</sup>, Ru-Jin Huang<sup>1\*</sup>, Fang Zhang<sup>4\*</sup>, Ying Wang<sup>1</sup>, Lu Chen<sup>5</sup>, Jurgita  
5 Ovadnevaite<sup>6</sup>, Darius Ceburnis<sup>6</sup>, Colin O'Dowd<sup>6</sup>

6 <sup>1</sup>*State Key Laboratory of Loess Science, Institute of Earth Environment, Chinese*  
7 *Academy of Sciences, Xi'an, 710061, China,*

8 <sup>2</sup>*Xi'an Institute for Innovative Earth Environment Research, Xi'an, 710061, China,*

9 <sup>3</sup>*State Key Laboratory of Advanced Environmental Technology, Institute of Urban*  
10 *Environment, Chinese Academy of Sciences, Xiamen, 361021, China,*

11 <sup>4</sup>*School of Civil and Environmental Engineering, Harbin Institute of Technology,*  
12 *Shenzhen, 518005, China,*

13 <sup>5</sup>*School of Ocean and Geographic Science, Yancheng Teachers University, Yancheng*  
14 *224051, China,*

15 <sup>6</sup>*School of Natural Sciences, Centre for Climate & Air Pollution Studies, Ryan Institute,*  
16 *University of Galway, University Road, Galway, Ireland*

17 Corresponding author: Ru-Jin Huang, [rujin.huang@ieecas.cn](mailto:rujin.huang@ieecas.cn); Fang Zhang,  
18 [zhangfang2021@hit.edu.cn](mailto:zhangfang2021@hit.edu.cn)

## 19 Supplementary Figures

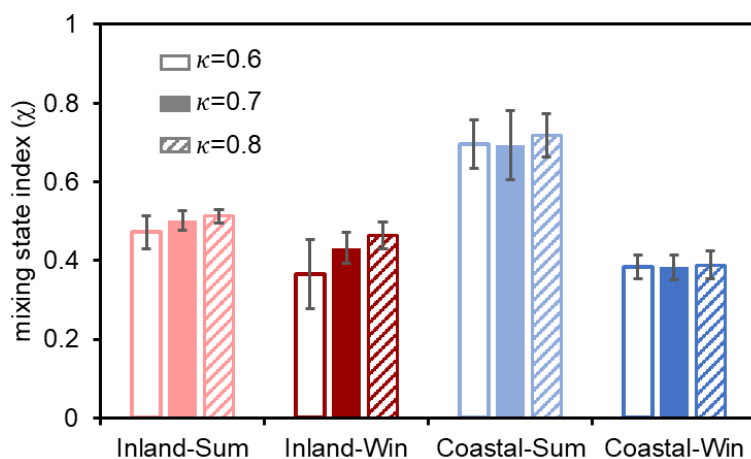

20

21 **Fig S1.** Sensitivity of the hygroscopic parameter for the group of the hygroscopic  
 22 species on the mixing state index  $\chi$ .

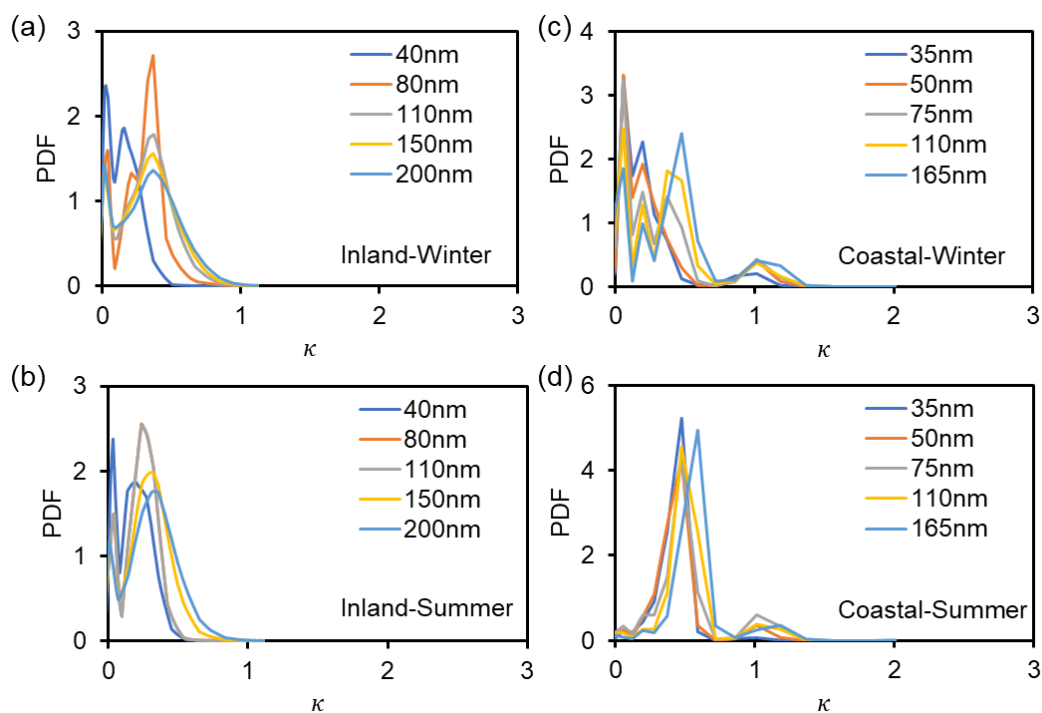

23

24 **Fig S2.** Mean value of the  $\kappa$ -PDF for aerosols of five diameters during winter and  
 25 summer periods in Inland (IAP) (a and b) and Coastal (MHD) (c and d) sites.

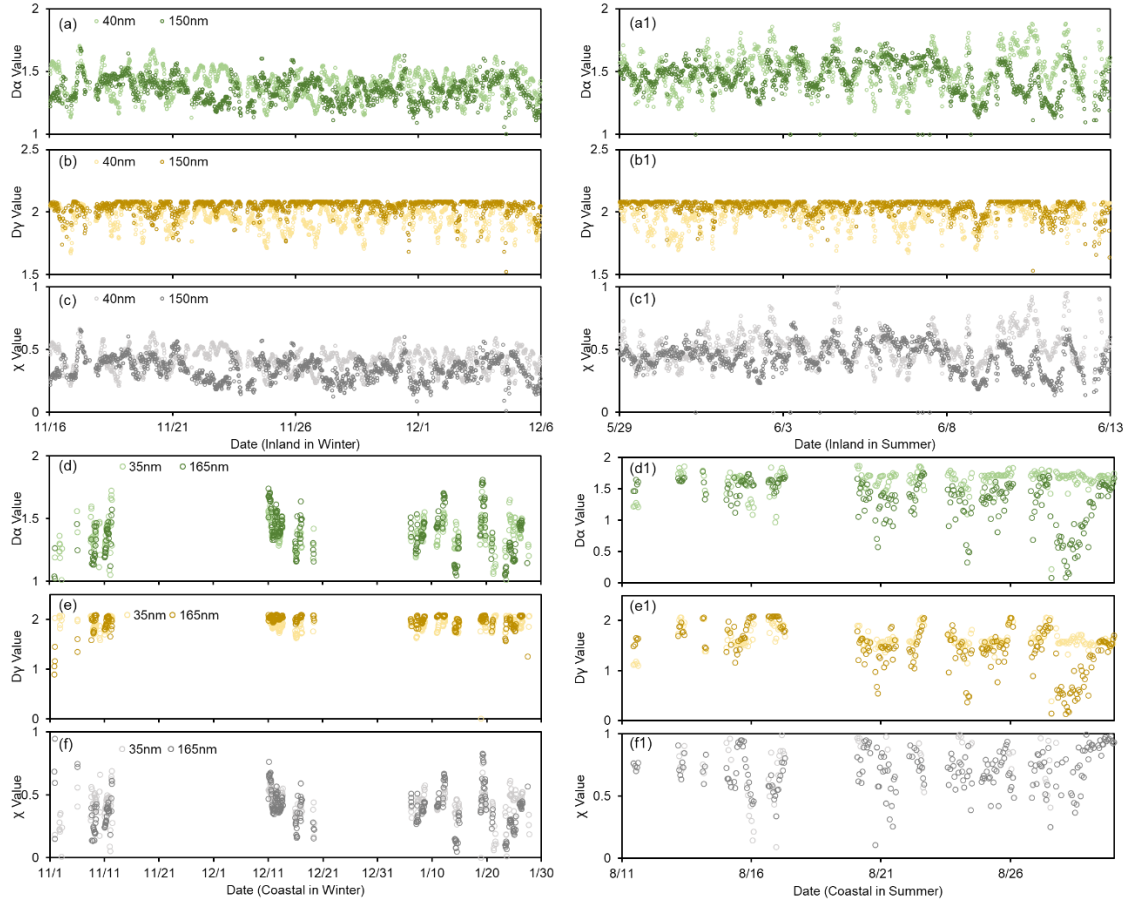

**Fig S3.** Time series of the average per-particle species diversity  $D\alpha$ , the bulk population species diversity  $D\gamma$ , and their affine ratio  $\chi$ . During winter and summer periods in Inland (IAP) and Coastal (MHD) sites.

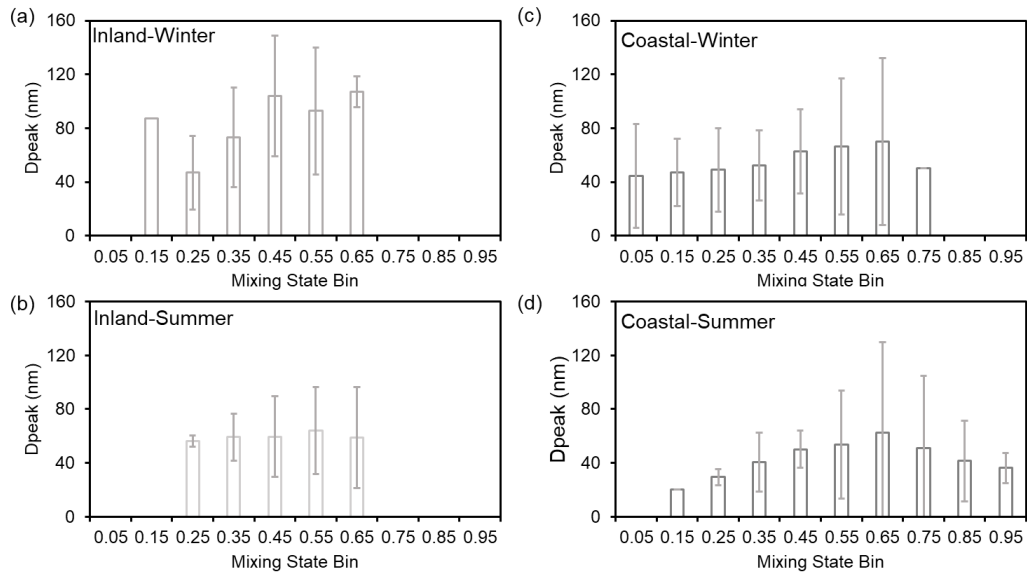

**Fig S4.** Variation of the peak diameter ( $D_{\text{peak}}$ ) with the mixing state index at the step of

0.1 during winter and summer periods in Inland (IAP) (a and b) and Coastal (MHD) sites (c and d).

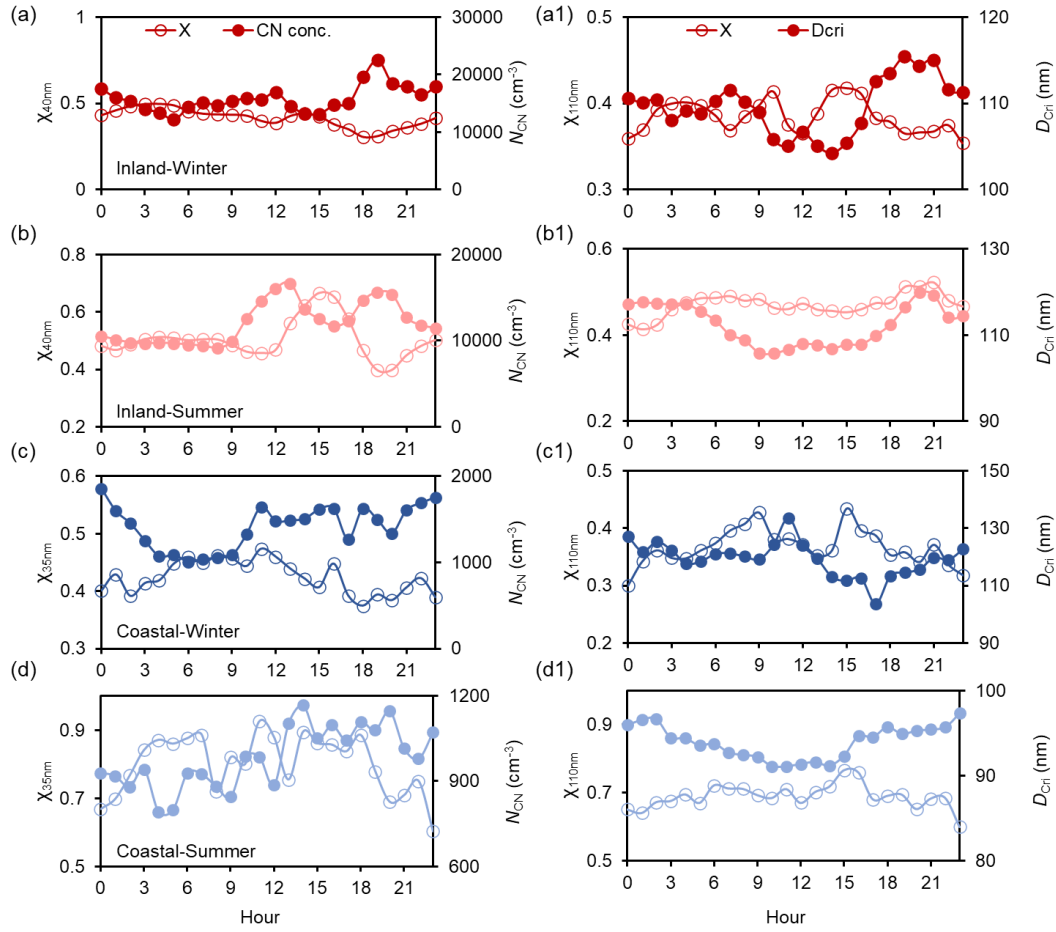

**Fig S5.** Diurnal variation of  $\chi$  and CN concentration during winter and summer periods for 40 nm and 150 nm aerosols in inland and for 35 nm and 165 nm aerosols coastal site.

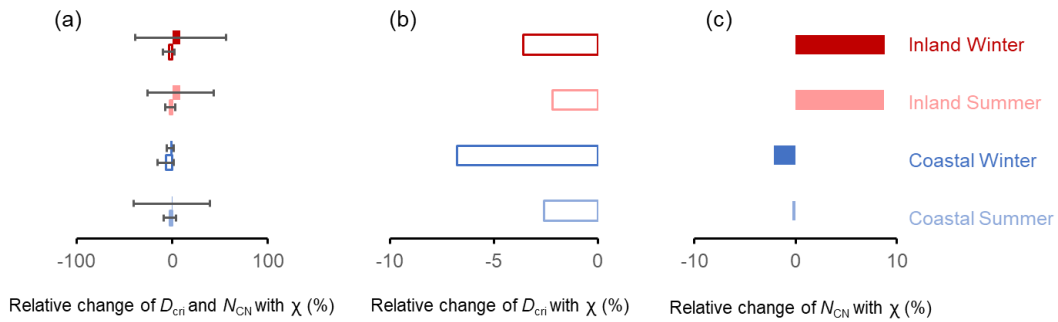

**Fig S6.** Relative change of the critical diameter and CN concentration with the mixing state index  $\chi$  in Inland-winter, Inland-summer, Coastal-winter and Coastal-summer.
